# Supplementary material for: The colocatome as a spatial -omic reveals shared microenvironment features between tumour–stroma assembloids and human lung cancer
Source: PubMed Central journal article supplement — bioRxiv. 2023 Sep 12:2023.09.11.557278. Preprint. [Version 1] doi: 10.1101/2023.09.11.557278 (PMC10515823; doi:10.1101/2023.09.11.557278), 2023-09-12
Supplement: NIHPP2023.09.11.557278v1-supplement-7.pdf [file NIHPP2023.09.11.557278v1-supplement-7.pdf]

## Supplementary methods

**Flow Cytometry Analysis.** After TRYPLE incubation, PDOs were dissociated into single-cell suspension. Cells were counted and aliquots of  $1 \times 10^6$  cells per condition were prepared. The samples were incubated for 5 minutes with 1  $\mu$ L of Zombie Aqua™ fixable viability dye in PBS 1X, then washed with flow cytometry buffer (FCB, 0.5% BSA, 0.02% NaN<sub>3</sub> and 2mM EDTA in PBS 1X) and centrifuged (500  $\times$  g, 5 minutes) before adding PFA at a final concentration of 1.6% for 10 minutes at room temperature in FCB. Cells were then centrifuged at 500  $\times$  g for 5 minutes at 4°C to pellet cells, PFA was removed, and cells were washed again with FCB. Cells were either long-term stored at -80°C in 500  $\mu$ L of FCB or permeabilised with 100  $\mu$ L of eBioscience™ Permeabilisation Buffer diluted at 1X concentration for 30 minutes on ice with a master mix of primary antibodies (see [Key Resource Table](#)). After the incubation with primary antibodies, cells were washed with FCB and spun down at 500  $\times$  g for 5 minutes at 4°C (2X). Then, cells were resuspended in 500  $\mu$ L of FCB, strained and analysed using a BD LSRFortessa™ X-20. Results were analysed using Cytobank single-cell analysis software with the gating strategies described in Extended Data Fig. 6.

**EMT analysis with PhenoSTAMP.** PHENOSTAMP was downloaded from GitHub under <https://github.com/anchangben/PHENOSTAMP>. Briefly, FCS files previously gated in Cytobank according to singlets and Live/Dead (Extended Data Fig. 6), were uploaded into R, and the PHENOSTAMP algorithm was used to project the PDOs on the 2D EMT–MET state map, as previously described here<sup>1</sup>.

## Supplementary references

1. Karacosta LG, Anchang B, Ignatiadis N, et al. Mapping Lung Cancer Epithelial-Mesenchymal Transition States and Trajectories with Single-Cell Resolution. *Nat Commun.* 2019;10:5587.
